# Supplementary material for: Prognostication in Epilepsy with Integrated Analysis of Blood Parameters and Clinical Data
Source: Preprints.org preprint supplement (doi:10.20944/preprints202408.1948.v1), 2024-08-27
Supplement: Supplementary file 1 [file supplementary]

**Table S1** Multiple linear regression for fibrinogen level

|  | B | Standardized error | 95% Confidence interval | β | P value |
| --- | --- | --- | --- | --- | --- |
| Final outcome | -10.946 | 4.259 | -19.3 – -2.59 | -0.066 | 0.010 |
| Sex | -10.346 | 3.929 | -18.05 – -2.64 | -0.066 | 0.009 |
| History of febrile seizure | -5.488 | 6.795 | -18.82 – 7.84 | -0.020 | 0.419 |
| MRI lesion | 1.523 | 4.632 | -7.56 – 10.61 | 0.010 | 0.742 |
| Generalized epilepsy | 10.946 | 6.093 | -1.01 – 22.9 | 0.046 | 0.073 |
| Structural etiology | 10.654 | 4.861 | 31.41 – 75.14 | 0.066 | 0.029 |
| Infectious etiology | 53.277 | 11.145 | -0.01 – 0.82 | 0.120 | <0.001 |
| Onset age | 0.405 | 0.213 | 7.24 – 20.18 | 0.104 | 0.057 |
| WBC | 13.709 | 3.297 | -0.5 – 2.16 | 0.448 | <0.001 |
| Neutrophil | 0.833 | 0.678 | -2.36 – 0.13 | 0.129 | 0.219 |
| Lymphocyte | -1.114 | 0.636 | -0.02 – 0 | -0.153 | 0.080 |
| ANC | -0.014 | 0.005 | -41.48 – -19.29 | -0.414 | 0.004 |
| Albumin | -30.386 | 5.654 | -13.76 – -4.13 | -0.148 | <0.001 |
| Number of initial ASM | -8.942 | 2.453 | -0.11 – 0.81 | -0.095 | <0.001 |
| Age of sampling | 0.348 | 0.235 | 1.12 – 20.19 | 0.080 | 0.140 |
| Sampling time from a recent seizure | -5.440 | 2.500 | -10.34 – -0.54 | -0.055 | 0.030 |

WBC, white blood cell; ANC, absolute neutrophil count; ASM, antiseizure medication.
